# Supplementary material for: Synergistic effects of exogenous melatonin and zinc oxide nanoparticles in alleviating cobalt stress in Brassica napus: insights from stress-related markers and antioxidant machinery
Source: Royal Society of Chemistry journal article supplement (doi:10.1039/d4en00821a), 2024-11-08
Supplement: d4en00821a1.pdf [file d4en00821a1.pdf]

**Table 1S** Treatments are shown in the completely randomized design.

| <b>Treatment No.</b> | <b>Description</b>                                  |
|----------------------|-----------------------------------------------------|
| T0                   | Control (No Cobalt + Melatonin + ZnO NPS applied)   |
| T1                   | MT 50 $\mu$ M (No Co applied)                       |
| T2                   | ZnO NPs 25 $\mu$ M (No Co applied)                  |
| T3                   | MT 50 $\mu$ M + ZnO NPs 25 $\mu$ M (No Co applied)  |
| T4                   | 300 $\mu$ M Co (alone)                              |
| T5                   | ZnO NPs 25 $\mu$ M + Co 300 $\mu$ M                 |
| T6                   | MT 50 $\mu$ M + ZnO NPs 25 $\mu$ M + Co 300 $\mu$ M |

**Table S2.** Primer sequences and data used for RT-PCR analysis.

| <b>Gene ID</b> | <b>Gene Name</b>                   | <b>Forward</b>                | <b>Reverse</b>            |
|----------------|------------------------------------|-------------------------------|---------------------------|
| SOD            | Super oxide dismutase(SOD)         | ACGGTGTGACCACTGTGACT          | GCACCGTGTGTTTACCATC       |
| CAT            | Catalase                           | TCGCCATGCTGAGAAGTATC          | TCTCCAGGCTCCTTGAAGTT      |
| APX            | Ascorbate peroxidases              | ATGAGGTTTGACGGTGAGC           | CAGCATGGGAGATGGTAGG       |
| PAL            | phenylalanine ammonia-lyase        | GGGTTGTCGTTGACGGAGTT          | CATTATGGAGCACATCTTGG      |
| PPO            | Polyphenol Oxidase                 | GAATCTTGGGCTCTTTA             | TTCCATTACGGTGACTT         |
| CAD            | Cinnamyl Alcohol Dehydrogenase     | ATGATGTCTACACCGACGGA          | ACGTGTGGAGCAAGAAACAC      |
| PsbA           | Photosystem II protein D1          | GTATTTATTATCGCCTTCATCG        | AGGACGCATACCCAAACG        |
| PsbB           | Photosystem II CP47 protein        | TAGGCGTAACGGTGGA              | AACATCTCGGAACAAGG         |
| PsbC           | Photosystem II CP43 protein        | TAATACGGCTTATCCGAGTGAGT<br>TT | TAATACGGCTTATCCGAGTGAGTTT |
| PsbD           | Photosystem II D2 protein          | GCCCTTGGTAGAGTTCCTAAAG        | CGAAATAAGCGCAAGGAAAGAG    |
| PsbO           | oxygen-evolving enhancer protein 1 | AGAGAGGCTCGGTGAAATAGA         | CCAATCCCAGGGAACAGTAAAG    |
